# Supplementary material
Source: PubMed Central journal article supplement (PMC2532062)

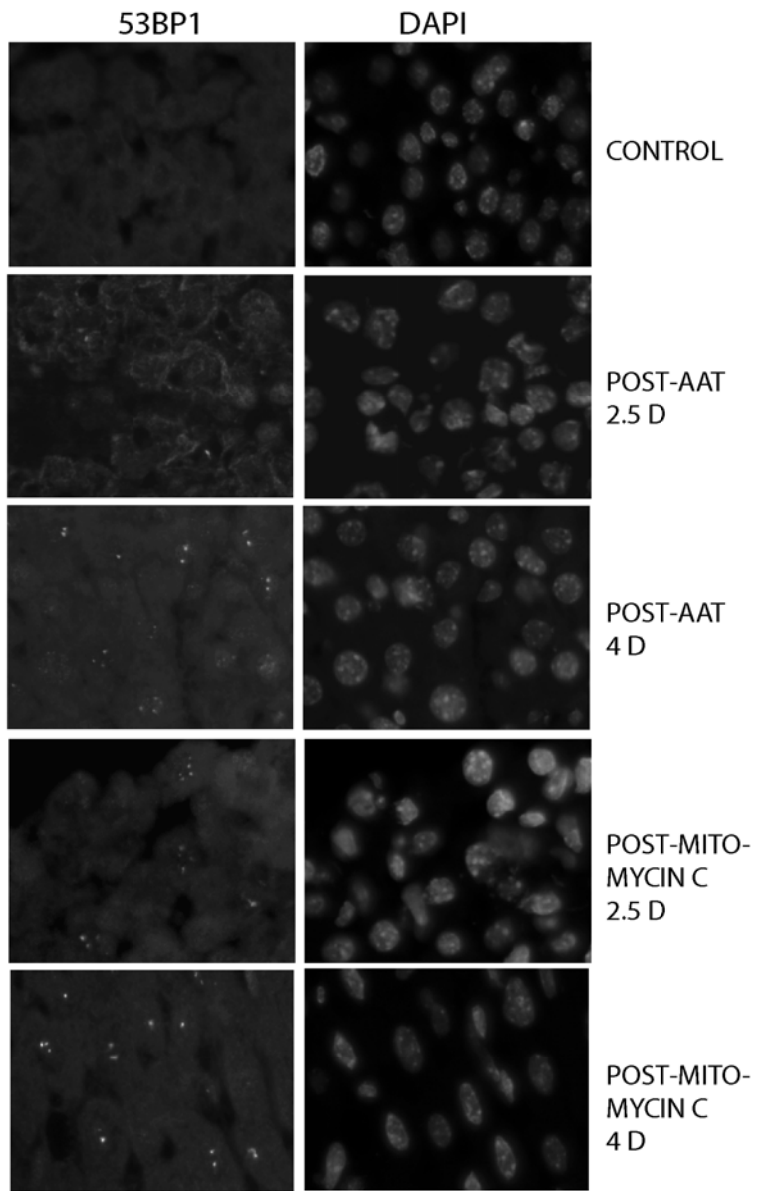

Supplemental Figure 1

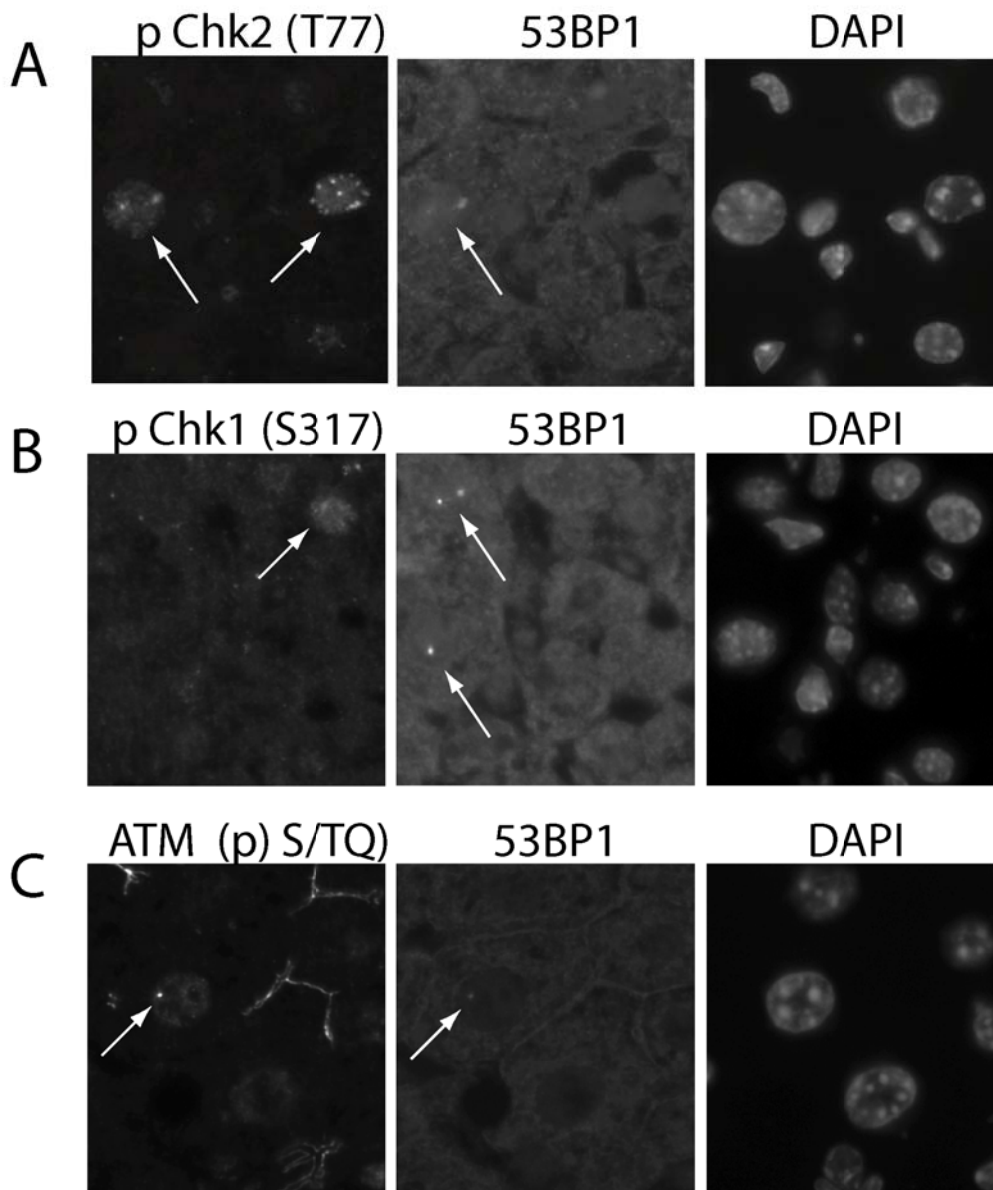

Supplemental Figure 2

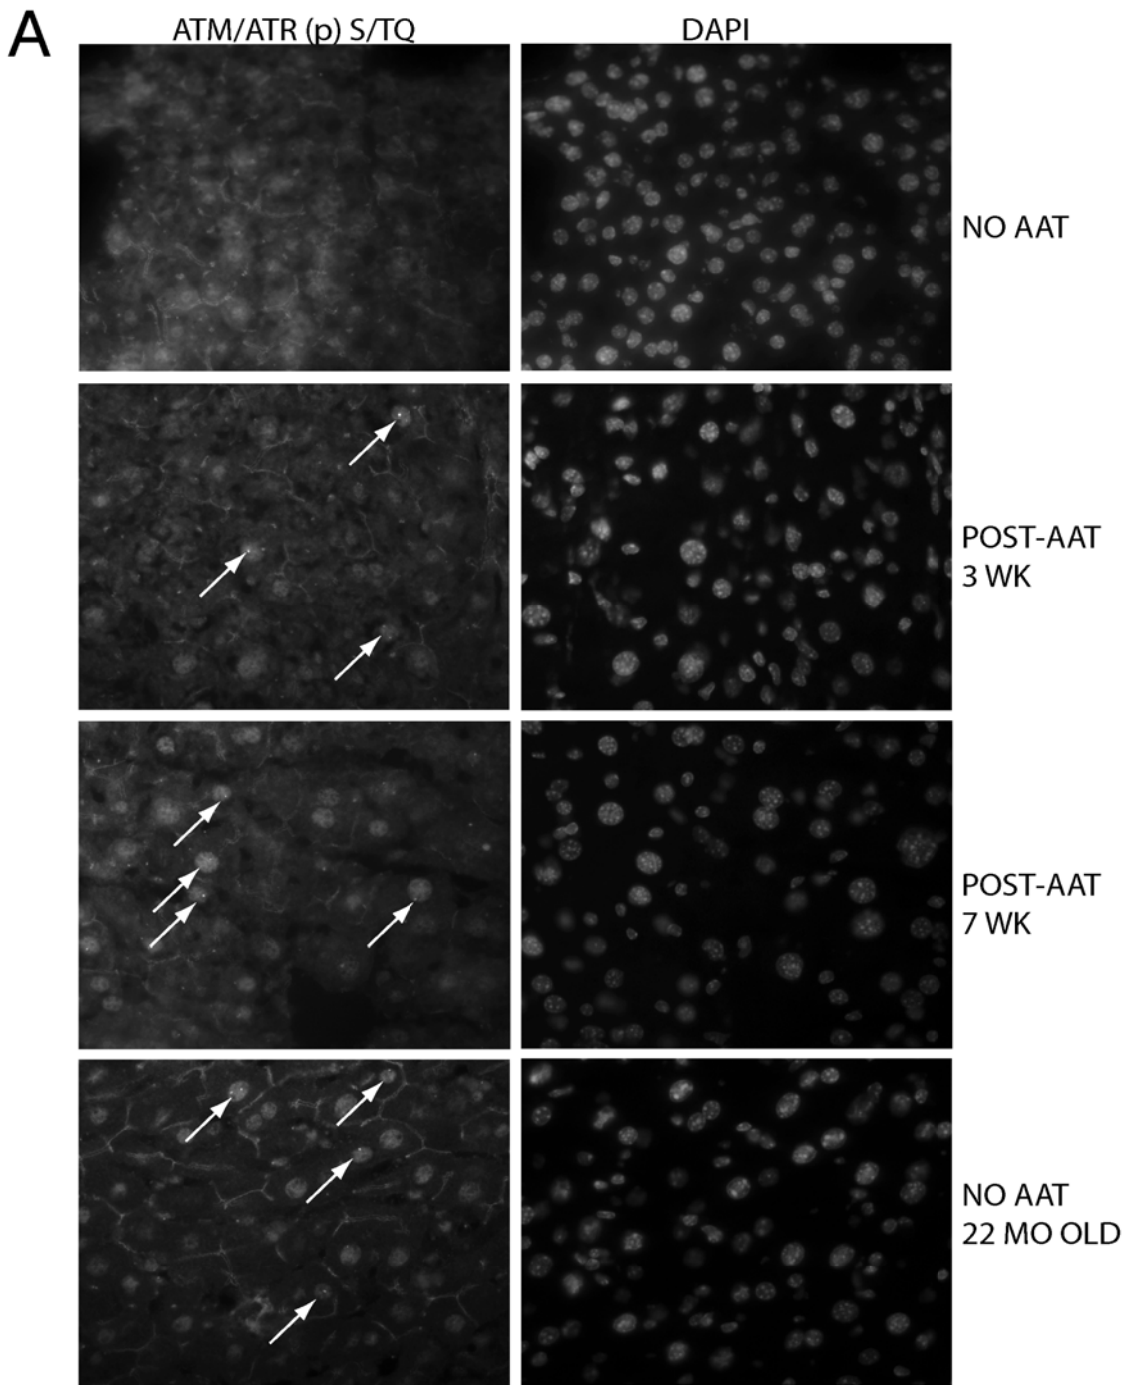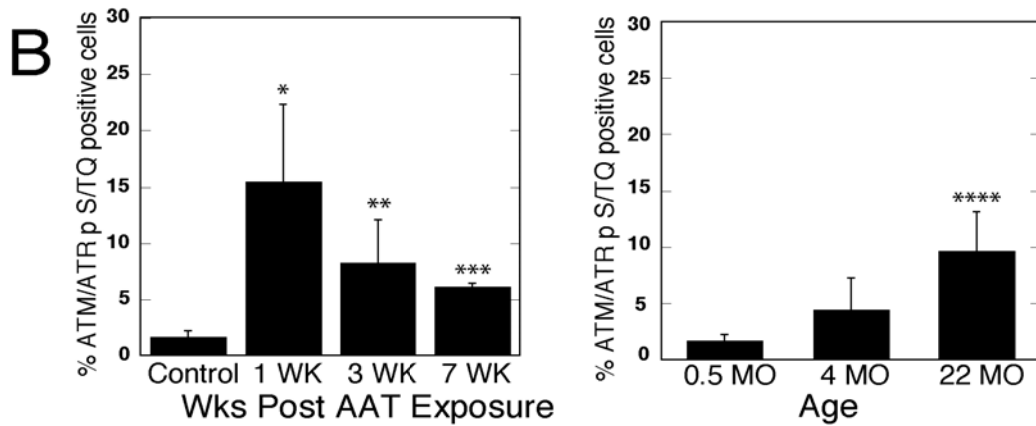

Supplemental Figure 3

Supplement: NIHMS53773-supplement-02.pdf [file NIHMS53773-supplement-02.pdf]
